# Supplementary material for: Bta-miR-199a-3p Inhibits LPS-Induced Inflammation in Bovine Mammary Epithelial Cells via the PI3K/AKT/NF-κB Signaling Pathway
Source: MDPI journal article supplement (doi:10.3390/cells11213518), 2022-11-07
Supplement: s1 [file s1]

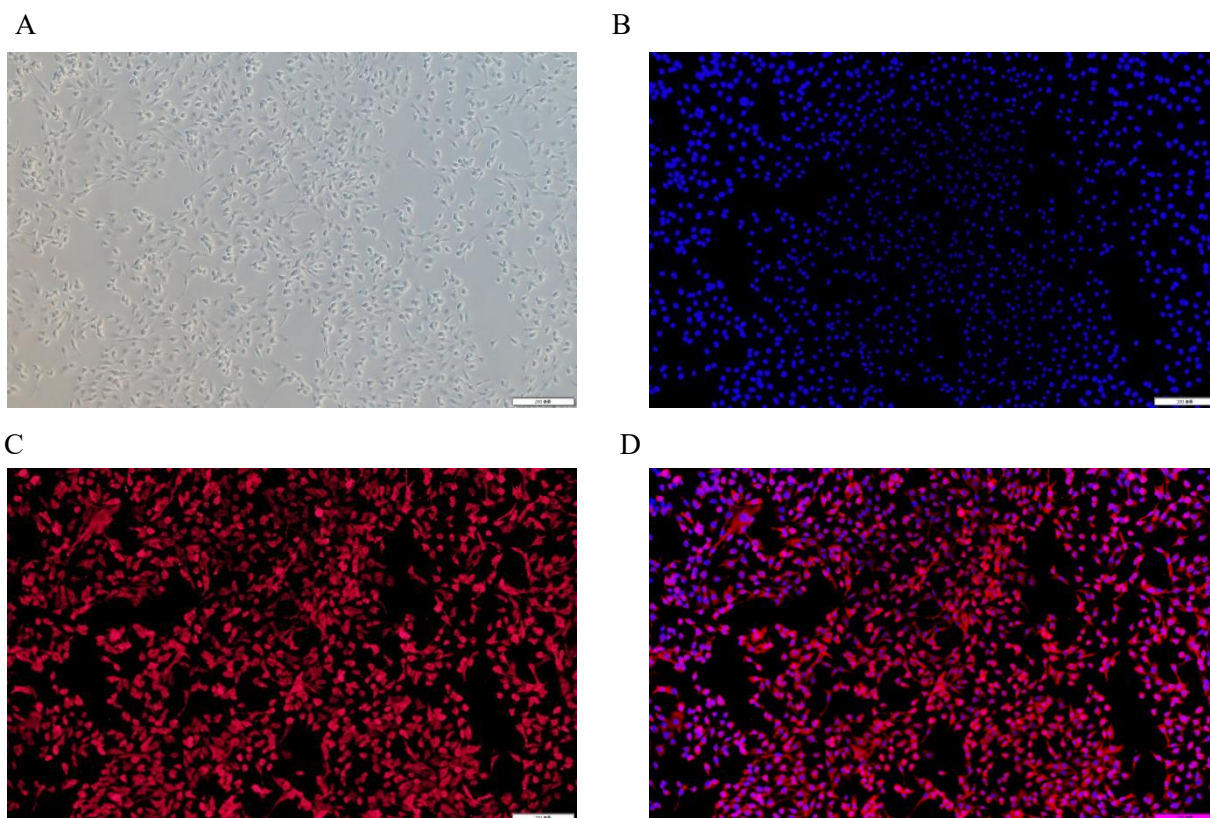

Figure S1. Identification of the MAC-T cells using immunofluorescence with Cytokeratin 18 (100 $\times$ ). (A) Bright field. (B) DAPI staining. (C) Immunofluorescence with Cytokeratin 18 labeled with Cy3. (D) Merge of B and C.
