# Supplementary material for: Bta-miR-199a-3p Inhibits LPS-Induced Inflammation in Bovine Mammary Epithelial Cells via the PI3K/AKT/NF-κB Signaling Pathway
Source: Cells. 2022 Nov 7;11(21):3518. doi: 10.3390/cells11213518 (PMC9656885; doi:10.3390/cells11213518)
Supplement: Supplementary file 1 [file cells-11-03518-s001.zip]

Archive with 4 entries (4 files):
- Figure S1. Identification of the MAC-T cells using immunofluorescence with Cytokeratin 18 (100í┴)..pdf
- Table S1. List of primers for 3í»-UTR amplification of the candidate target genes..xlsx
- Table S2. List of all primer sequences using qRT-PCR..xlsx
- Table S3. The information of the ELISA kit..xlsx
