# Supplementary material for: Bta-miR-199a-3p Inhibits LPS-Induced Inflammation in Bovine Mammary Epithelial Cells via the PI3K/AKT/NF-κB Signaling Pathway
Source: Cells. 2022 Nov 7;11(21):3518. doi: 10.3390/cells11213518 (PMC9656885; doi:10.3390/cells11213518)
Supplement: Supplementary file 1 [file cells-11-03518-s001.zip › Table S1. List of primers for 3í»-UTR amplification of the candidate target genes..xlsx]

## Sheet: Sheet1
Gene name	Primers (5´→3´)	Product size (bp)	Annealing temperature (℃)
MTOR	F: ccgCTCGAGCCCACAGCACTTCTCTTGA	520	62
	R: atttGCGGCCGCCATCTTGCGAGGGTTGTT
CD2AP	F: ccgCTCGAGAAAGTTGTAGGTGGGAGG	479	58
	R: atttGCGGCCGCTGGGTGAGTAATCTGGTTC
Note: The lowercase letters "ccg" and "attt" are protective bases, and the uppercase bold letters are enzyme cleavage sites.
