# Supplementary material for: Bta-miR-199a-3p Inhibits LPS-Induced Inflammation in Bovine Mammary Epithelial Cells via the PI3K/AKT/NF-κB Signaling Pathway
Source: Cells. 2022 Nov 7;11(21):3518. doi: 10.3390/cells11213518 (PMC9656885; doi:10.3390/cells11213518)
Supplement: Supplementary file 1 [file cells-11-03518-s001.zip › Table S2. List of all primer sequences using qRT-PCR..xlsx]

## Sheet: Sheet1
Name	Primers (5´→3´)	Product size (bp)
miR-199a-3p	RT: GTCGTATCCAGTGCGTGTCGTGGAGTCGGCAATTGCACTGGATACGACTAACCAAT	-
	F: GCTCGCACAGTAGTCTGCAC	56
	R: GTGTCGTGGAGTCGGCAA
IL-1β	F: CAACCGTACCTGAACCC	193
	R: GACACCACCTGCCTGAA
IL-6	F: CACTCCATTCGCTGTCT	227
	R: GTGTCTCCTTGCTGCTT
TNF-α	F: TCTACCAGGGAGGAGTCTTCCA	68
	R: GTCCGGCAGGTTGATCTCA
CASP3	F: AAGATTTAGTGCCGATGC	175
	R: GACCACCAAGTTCTAGGATA
CASP9	F: CCTGCCTTACCATTCACC	205
	R: GCATTCTGCTCCTCCTCC
TLR4	F: GCCGTAAGGTTATTGTCGTG	125
	R: CAGGACGATGAAGATGATGC
NFKB1	F: ACGGGGAAGGTCTGAATG	220
	R: GTAGTCCCGTCATAAGTGG
RELA	F: CCCCATCTTTGACAACCG	148
	R: TCCCGTGAAATACACCTCG
PIK3R1	F: CGGTAGCCGTTTCCAGTG	100
	R: ATGCTGGGCGACCTAATG
PIK3CA	F: AATAGGCAAGTTGAGGC	174
	R: CTGATGAGCAGGGTTTAG
AKT1	F: TTACGCCACCTGACCAAGA	233
	R: GGTTCCACTCAAACGCATC
AKT3	F: TTGTGAAAGAAGGTTGGGTT	192
	R: TTGGCTTTGGTCGTTCTG
CD2AP	F: GAAGACCAAGAAGCGTCAGTGT	140
	R: TGTTGTTCAGGGTTCCACTCC
GADPH	F: GGCATCGTGGAGGGACTTATG	186
	R: GCCAGTGAGCTTCCCGTTGAG
RPS18	F: GTGGTGTTGAGGAAAGCAGACA	79
	R: TGATCACACGTTCCACCTCATC
