# Supplementary material for: Bta-miR-199a-3p Inhibits LPS-Induced Inflammation in Bovine Mammary Epithelial Cells via the PI3K/AKT/NF-κB Signaling Pathway
Source: Cells. 2022 Nov 7;11(21):3518. doi: 10.3390/cells11213518 (PMC9656885; doi:10.3390/cells11213518)
Supplement: Supplementary file 1 [file cells-11-03518-s001.zip › Table S3. The information of the ELISA kit..xlsx]

## Sheet: Sheet1
	IL-1β	IL-6	TNF-α
Catalog Number	CSB-E12986B	CSB-E12899B	CSB-E12020B
detection range	62.5 pg/mL-4000 pg/mL	5 pg/mL-1000 pg/mL	0.1 ng/mL-20 ng/mL
Intra-assay Precision (Precision within an assay)	CV%<8%	CV%<15%	CV%<15%
Inter-assay Precision (Precision between assays)	CV%<10%	CV%<15%	CV%<15%
